# Supplementary material for: Metas-Chip precisely identifies presence of micrometastasis in live biopsy samples by label free approach
Source: PubMed Central journal article supplement (PMC5736647; doi:10.1038/s41467-017-02184-x), 2017-12-19
Supplement: 41467_2017_2184_MOESM1_ESM.pdf [file 41467_2017_2184_MOESM1_ESM.pdf]

## Supplementary Information

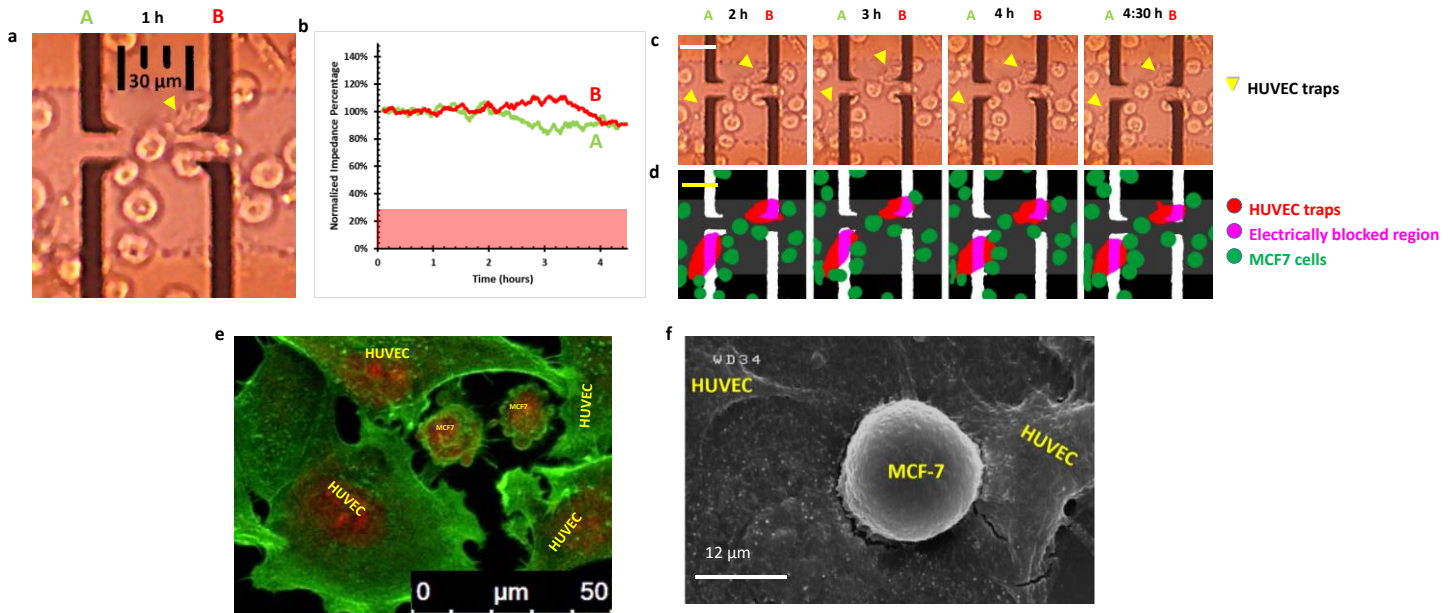

*Supplementary Figure 1 - No invasive interaction was observed and recorded for MCF-7 cells in similar time. Cells just attach beneath the HUVEC traps (a) but neither retract them nor induce reductive electrical spikes (b & c). HUVECs maintained their primary location with minor fluctuation during 4.5hr after addition of MCF-7 cells (d). Confocal (e) and FE-SEM image (f) images from interaction between MCF-7 cells and HUVEC trap. Scale Bars in c and d are 30  $\mu$ m in length.*

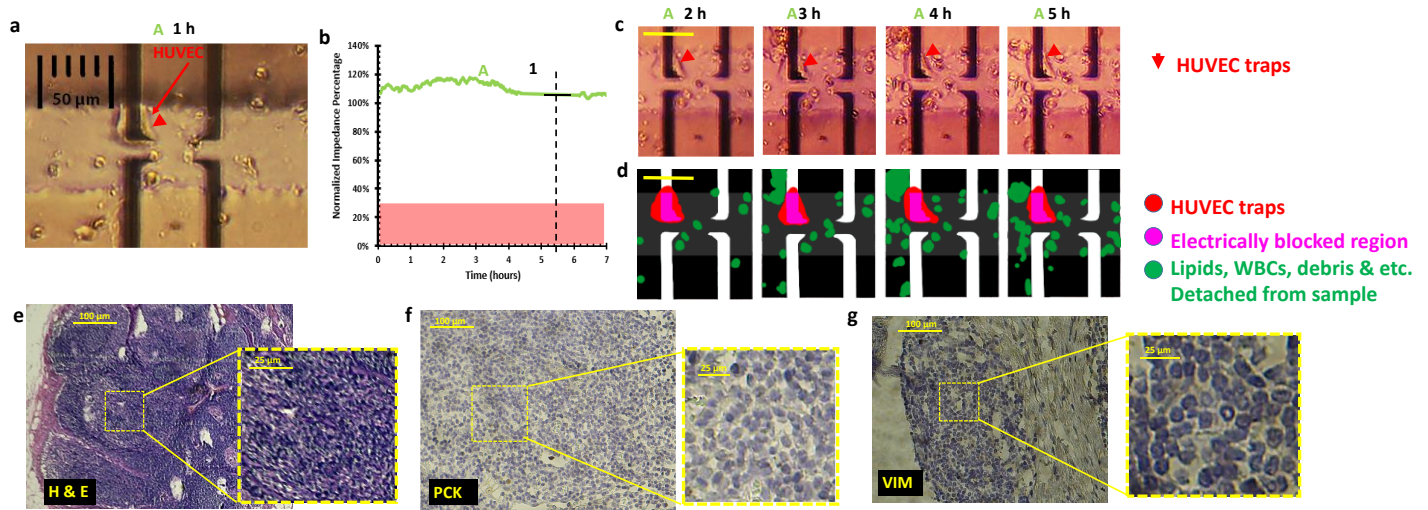

*Supplementary Figure 2 - Non metastatic sample images taken from whole slide images of breast tissue. (a) Metas-Chip didn't trap any tumor cell with invasive interaction and no signal reduction was recorded. Some lipid cells, WBCs and debris detached from the lymph biopsy sample could be observed on the sensor without applying any invasive interaction with sensing traps. (c) H&E stained SLNs specimen presented no trace of any metastatic cells. IHC of the patient's SLNs stained by (d) P-CK and (e) vimentin show no expression of malignant markers. Scale Bars in c and d are 50 μm in length.*

ID 36

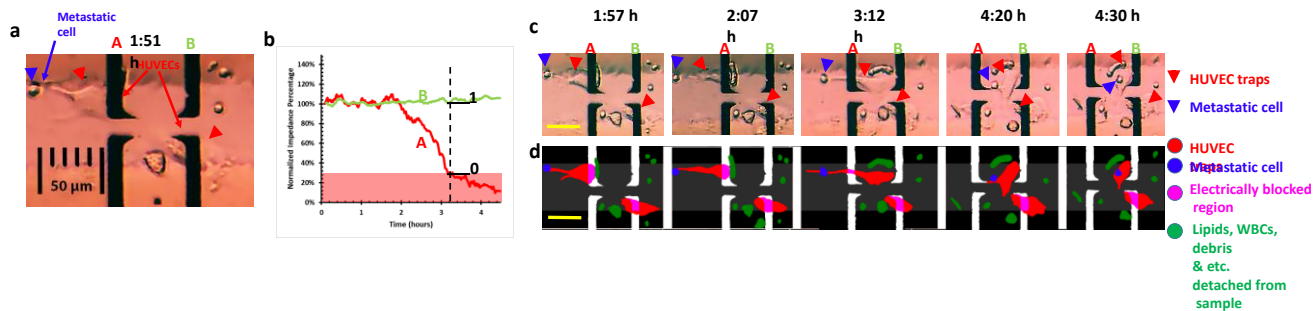

ID 37

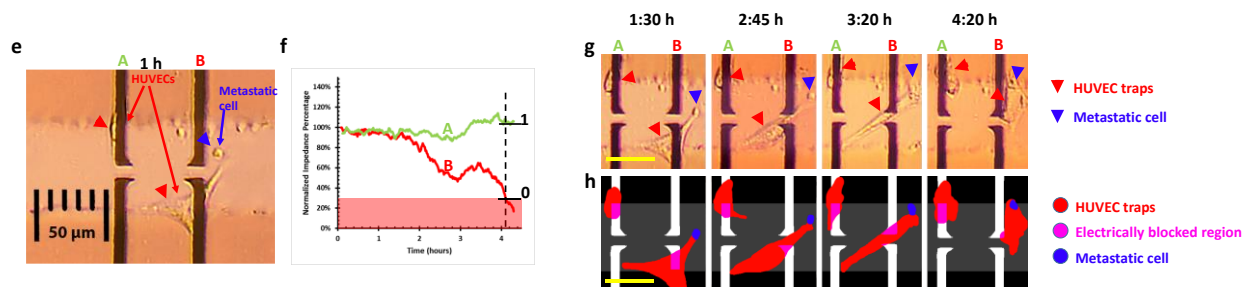

Supplementary Figure 3 – Metas-Chip, histopathological & IHC results of the patients who are suspicious for metastasis. Metas-Chip detected at least one invasive cell (a & e) induced reductive electrical spike in the response of the sensing trap in both of the patients (b & f) which corroborated by time-lapse optical imaging captured by Metas-Chip (c & g). Moreover simultaneous schematics indicate the impedance reduction of the electrodes is correlated by the retraction of the HUVECs (being invaded) from the sensing region (d & h).

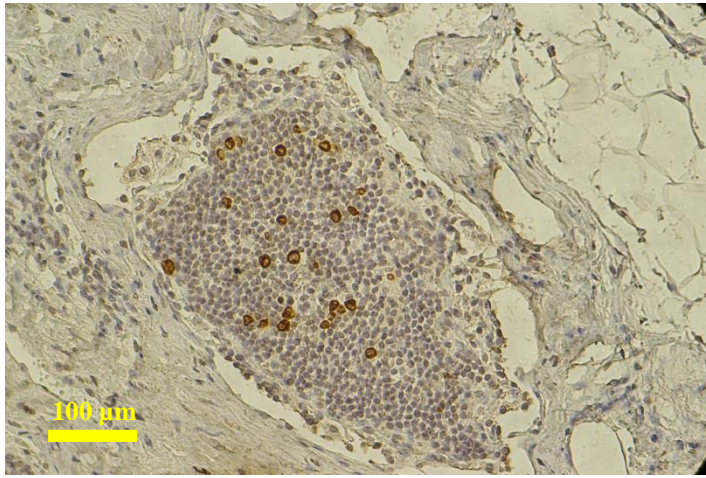

*Supplementary Figure 4 - expression of P-CK in the SLN of patient ID:38, whom had been diagnosed as negative by H&E but positive by Metas-Chip*

a

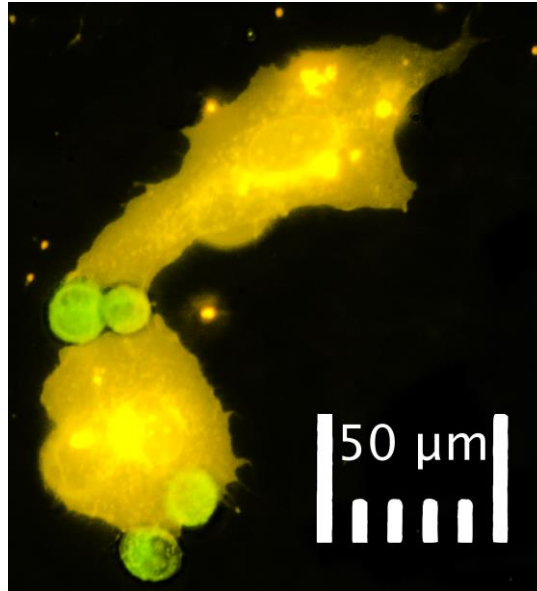

b

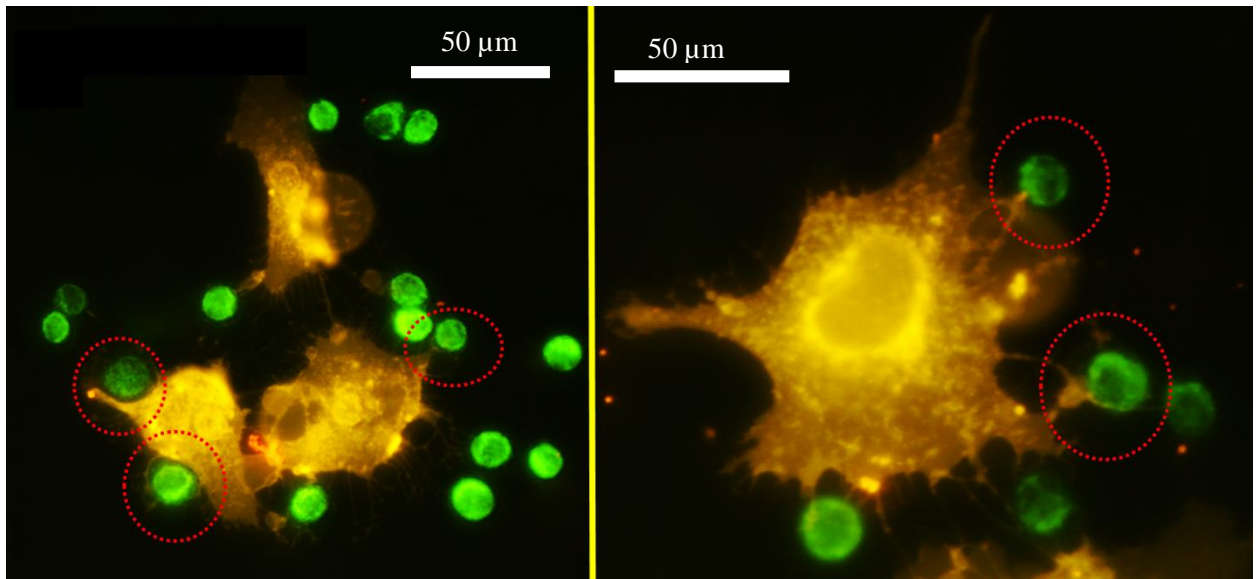

٦٨

Supplementary Figure 5 – a) Epifluorescent image taken from a retracted endothelial cells invaded by two metastatic breast cells revealed the expression of MMP metastatic markers on both of them. b) Entrance of MMP2 expressed metastatic cells to single HUVEC traps. The red dotted circles presents the startment of metastasis.

## **Non-matching between prognostic marker expression and metastatic ability of cancer cells**

Other prognostic markers such as Ki67 aren't indications in metastatic diagnosis. Multivariate analysis showed that Ki-67 expression in the metastases was a superior independent prognostic factor of clinical outcomes compared to that in the primary tumors<sup>1</sup>. In a patient with metastatic breast cancer (detected by Metas-Chip) with lymph nodes involvement, co-staining of biopsy samples for ki67 showed no notable difference from their expression in non-metastatic breast cancer patients cells (Supplementary Supplementary Figure 6).

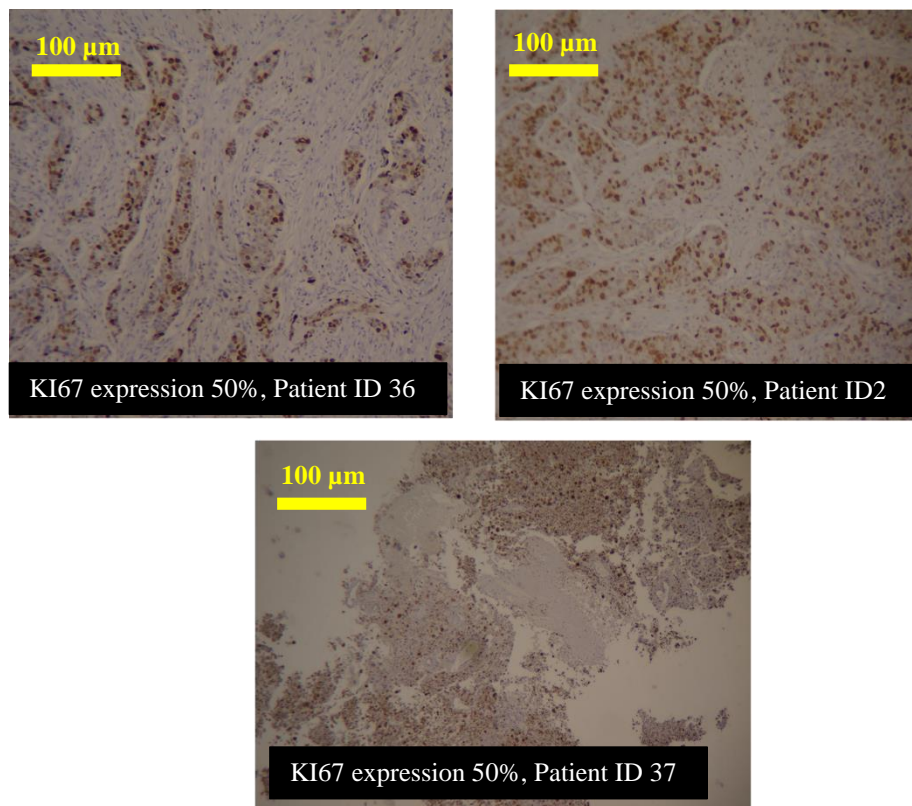

*Supplementary Figure 6 - Expression of Ki67 (as prognostic factor) in the breast tumor of the patient, couldn't be an indication for metastasis. Similar expression in two patients with different involvement of cancer cells to their SLNs (ID 36 Vs ID 2).*

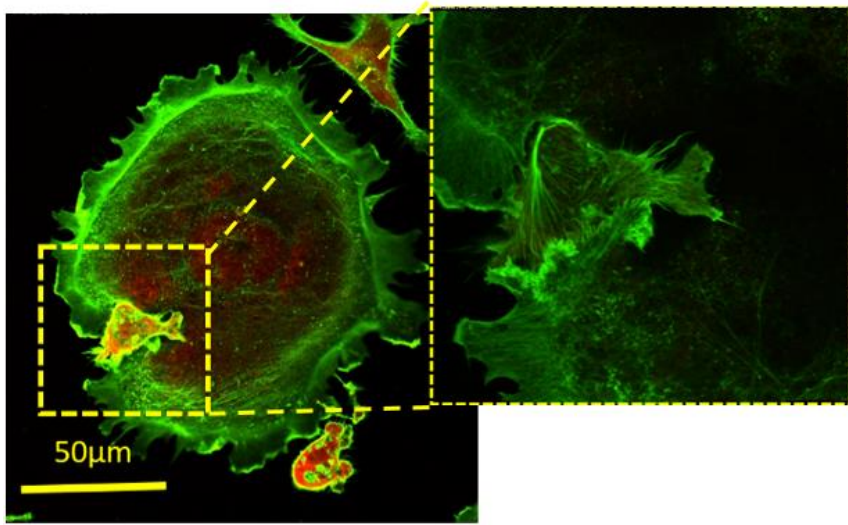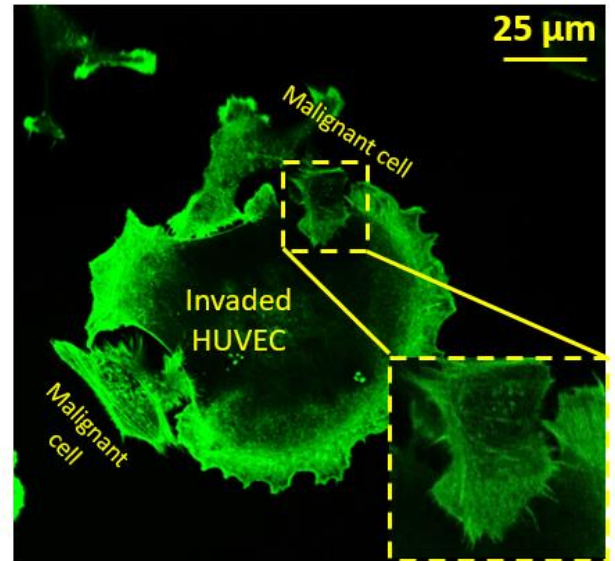

Supplementary Figure 7 - Confocal images of two pairs of metastatic cells during their invasion to two HUVEC traps.

| Patient ID | Metas-Chip | Pap stain malignancy | IHC |     |     |
|------------|------------|----------------------|-----|-----|-----|
|            |            |                      | EMA | CK7 | PCK |
| 41         | ✓          | ✓                    | ✓   | ✓   | ✓   |
| 42         | ✓          | ✓                    | ✓   | ✓   | ✓   |
| 43         | ✓          | ✓                    | ✓   | ✓   | ✓   |
| 44         | ✓          | ✓                    | ✗   | ✓   | ✓   |
| 45         | ✓          | ✓                    | ✓   | ✓   | ✓   |
| 46         | ✓          | ✓                    | ✓   | ✗   | ✓   |
| 47         | ✓          | ✓                    | ✓   | ✓   | ✓   |
| 48         | ✓          | ✓                    | ✓   | ✗   | ✓   |
| 49         | ✓          | ✓                    | ✓   | ✗   | ✓   |
| 50         | ✓          | ✓                    | ✗   | ✓   | ✓   |
| 51         | ✓          | ✓                    | ✓   | ✓   | ✓   |
| 52         | ✓          | ✓                    | ✓   | ✗   | ✓   |
| 53         | ✗          | ✗                    | ✗   | ✗   | ✗   |
| 54         | ✗          | ✗                    | ✗   | ✗   | ✗   |
| 55         | ✗          | ✗                    | ✗   | ✗   | ✗   |
| 56         | ✗          | ✗                    | ✗   | ✗   | ✗   |
| 57         | ✗          | ✗                    | ✗   | ✗   | ✗   |
| 58         | ✗          | ✗                    | ✗   | ✗   | ✗   |
| 59         | ✗          | ✗                    | ✗   | ✗   | ✗   |
| 60         | ✗          | ✗                    | ✗   | ✗   | ✗   |
| 61         | ✗          | ✗                    | ✗   | ✗   | ✗   |
| 62         | ✗          | ✗                    | ✗   | ✗   | ✗   |
| 63         | ✗          | ✗                    | ✗   | ✗   | ✗   |
| 64         | ✗          | ✗                    | ✗   | ✗   | ✗   |
| 65         | ✗          | ✗                    | ✗   | ✗   | ✗   |
| 66         | ✗          | ✗                    | ✗   | ✗   | ✗   |
| 67         | ✓          | ✗                    | ✓   | ✓   | ✗   |
| 68         | ✓          | ✗                    | ✓   | ✗   | ✓   |
| 69         | ✓          | ✗                    | ✓   | ✗   | ✗   |
| 70         | ✓          | ✗                    | ✗   | ✗   | ✓   |

**G1**

**G2**

**G3**

**Metas-Chip and Pap legends**

✓ Positive

✗ Negative

**IHC legend**

✓ Many metastatic cells

✓ Few metastatic cells

✗ No metastatic cell

*Supplementary Table 1 - Metas-Chip, Pap staining and IHC diagnostic results of lymph nodes removed from breast cancer patients by FNA. Expression of Pancycytocheratin(PCK), Epithelial Membrane Antigen(EMA) and Cytocheratin-7(CK7) markers were assayed by IHC as a reference diagnosis in FNA samples.*



| Patient ID | Metas-Chip | H&E Invasion | IHC | RT-PCR     |            |
|------------|------------|--------------|-----|------------|------------|
|            |            |              | PCK | E-Cadherin | N-Cadherin |
| 1          | ✓          | ✓            | ✓   | 2.78       | 21.56      |
| 2          | ✓          | ✓            | ✓   | 3.45       | 24.56      |
| 3          | ✓          | ✓            | ✓   | 3.85       | 36.68      |
| 13         | ✓          | ✓            | ✓   | 4.71       | 20.72      |
| 14         | ✓          | ✓            | ✓   | 3.15       | 22.76      |
| 15         | ✓          | ✓            | ✓   | 2.22       | 28.29      |
| 25         | ✓          | ✓            | ✓   | 2.09       | 33.81      |
| 27         | ✓          | ✓            | ✓   | 3.68       | 29.58      |
| 28         | ✓          | ✓            | ✓   | 3.15       | 23.67      |
| 32         | ✓          | ✓            | ✓   | 2.77       | 24.03      |
| 33         | ✓          | ✓            | ✓   | 3.75       | 26.93      |
| 36         | ✓          | ✓            | ✓   | 3.73       | 29.75      |
| 37         | ✓          | ✓            | ✓   | 3.05       | 20.38      |
| 38         | ✓          | ✓            | ✓   | 3.37       | 37.73      |
| 39         | ✓          | ✓            | ✓   | 2.41       | 23.34      |
| 40         | ✓          | ✓            | ✓   | 4.06       | 37.17      |

**G1**

**G2**

**G3**

**Metas-Chip and H&E legends**

✓ Positive  
✗ Negative

**IHC legend**

✓ Many invasive cancer cells  
✓ Few invasive cancer cells  
✗ No invasive cancer cell

**RT-PCR legend**

0                      1                      >10

*Supplementary Table 2 - Metas-Chip, H&E, IHC and RT-PCR diagnostic results of breast tumors removed from breast cancer patients by CNB. Expression of Pancytocheratin(PCK) marker was assayed by IHC as a reference diagnosis in the samples. Detection of invasive cells in the CNB of the patients' breast region (diagnosed by both Metas-Chip & pathological assays) has been corroborated by sharper expression of N-Cad transcript.*

| Patient ID | Metas-Chip | Pap Stain malignancy |
|------------|------------|----------------------|
| 41         | ✓          | ✓                    |
| 42         | ✓          | ✓                    |
| 43         | ✓          | ✓                    |
| 57         | ✗          | ✗                    |
| 58         | ✗          | ✗                    |
| 67         | ✓          | ✓                    |

**G1**

**G2**

**G3**

**Metas-Chip and Pap legend**

✓ Positive

✗ Negative

*Supplementary Table 3 - Metas-Chip and H&E diagnostic results of breast tumors removed from breast cancer patients by FNA.*

| <b>Step</b> | <b>Reagent</b>                | <b>Time</b>   |
|-------------|-------------------------------|---------------|
| <b>1</b>    | 95% Alcohol (Fixation)        | 15-30 minutes |
| <b>2</b>    | 80% Alcohol                   | 2 minutes     |
| <b>3</b>    | 60% Alcohol                   | 2 minutes     |
| <b>4</b>    | Distilled Water               | 5 dips        |
| <b>5</b>    | Distilled Water               | 5 dips        |
| <b>6</b>    | Hematoxylin stain             | 3 minutes     |
| <b>7</b>    | Distilled Water               | 3 minutes     |
| <b>8</b>    | 60% Alcohol                   | 2 minutes     |
| <b>9</b>    | 80% Alcohol                   | 2 minutes     |
| <b>10</b>   | 95% Alcohol                   | 2 minutes     |
| <b>11</b>   | Orange G Stain                | 3 minutes     |
| <b>12</b>   | 95% Alcohol                   | 2 minutes     |
| <b>13</b>   | 95% Alcohol                   | 2 minutes     |
| <b>14</b>   | Eosin Azure Stain             | 3 minutes     |
| <b>15</b>   | 95% Alcohol                   | 2 minutes     |
| <b>16</b>   | 95% Alcohol                   | 2 minutes     |
| <b>17</b>   | 95% Alcohol                   | 2 minutes     |
| <b>18</b>   | 95% Alcohol                   | 2 minutes     |
| <b>19</b>   | Absolute Alcohol              | 2 minutes     |
| <b>20</b>   | Absolute Alcohol              | 2 minutes     |
| <b>21</b>   | Absolute Alcohol              | 2 minutes     |
| <b>22</b>   | Absolute Alcohol+Xylene (1:1) | 2 minutes     |
| <b>23</b>   | Xylene                        | 2 minutes     |
| <b>24</b>   | Xylene                        | 2 minutes     |
| <b>25</b>   | Xylene                        | Till clear    |
| <b>26</b>   | Mount in D.P.X                |               |

*Supplementary Table 4 - Procedure of Progressive Papanicolaou Staining Method used for staining of FNA samples*

|                                      |                                                                                                                                                                              |
|--------------------------------------|------------------------------------------------------------------------------------------------------------------------------------------------------------------------------|
| Biospecimen type                     | <ul style="list-style-type: none"> <li>- Solid tissue, Core needle biopsy from breast tumor and lymph node</li> <li>- Fine Needle Aspiration</li> </ul>                      |
| Anatomical site                      | Breast                                                                                                                                                                       |
| Disease status of patients           | Breast Cancer                                                                                                                                                                |
| Clinical characteristics of patients | Breast cancer patients with suspicious lymph node to metastasis                                                                                                              |
| Vital State of patients              | Alive                                                                                                                                                                        |
| Clinical diagnosis of patients       | Breast cancer                                                                                                                                                                |
| Pathology diagnosis                  | <p>Ductal Invasive Carcinoma with different grades with involved or safe sentinel lymph nodes.</p> <p>Threated breast cancer with involved or safe auxiliary lymph nodes</p> |
| Collection mechanism                 | Core needle biopsy or Fine needle aspiration                                                                                                                                 |
| Type of stabilization                | <p>For Metas-Chip assaying: DMEM+FBS, 37 °C</p> <p>For Pathological assaying: Fixing in formalin</p>                                                                         |
| Type of long-term preservation       | Freezing for pathological assay, exposing to RNase & storing in liquid N2 for Real Time PCR                                                                                  |
| Constitution of preservative         | 10% neutral-buffered formalin                                                                                                                                                |
| Storage temperature                  | 37 °C for metas-chip assays, -196 °C for Real Time PCR                                                                                                                       |
| Storage duration                     | 5 hours for metas-chip assays, 8 months for Real Time PCR                                                                                                                    |
| Shipping temperature                 | 37 °C for metas-chip assays, -196 °C for Real Time PCR                                                                                                                       |
| Composition assessment & selection   | Patients candidate for core needle biopsy with suspicious lymph nodes                                                                                                        |

*Supplementary Table 5 - Quick-Reference BRISQ Summary/Checklist*

| Name              | Primer-probe | Sequence (5'-3')            | T <sub>m</sub> (°C) | T <sub>m</sub> set up | Amplicon size (bp) |
|-------------------|--------------|-----------------------------|---------------------|-----------------------|--------------------|
| <b>N-Cadherin</b> | R            | TGCCTTCATCACCAAACATTTGGC    | 58.5                | 60                    | 115                |
| <b>N-Cadherin</b> | F            | GCTGGCCGTAAACTGCTTTGTG      | 58.6                | 60                    | 115                |
| <b>E-Cadherin</b> | R            | GTACTCGCTCATAGGATGGTAGG     | 56.4                | 60                    | 136                |
| <b>E-Cadherin</b> | F            | GGTGCTGGTCTGTGTTCTGG        | 58.3                | 60                    | 136                |
| <b>Vimentin</b>   | R            | GGGTTCCGCTGGATCAAGACC       | 58.2                | 60                    | 138                |
| <b>Vimentin</b>   | F            | CCTGGCCGTGCTAGACAATGG       | 58.5                | 60                    | 138                |
| <b>Beta2M</b>     | F            | ATG CCT GCC GTG TGA AC      | 55                  | 60                    | 91                 |
| <b>Beta2M</b>     | R            | ATC TTC AAA CCT CCA TGA TG  | 54                  | 60                    | 91                 |
| <b>MMP2</b>       | F            | GCT CGT GCC TTC CAA GTC     | 58.4                | 59                    | 136                |
| <b>MMP2</b>       | R            | AGT CCG TCC TTA CCG TCA A   | 57.3                | 63                    | 181                |
| <b>MMP9</b>       | F            | CGG ACC AAG GAT ACA GTT TGT | 59.4                | 60                    | 116                |
| <b>MMP9</b>       | R            | CTC AGT GAA GCG GTA CAT AGG | 61.3                | 63                    | 181                |

*Supplementary Table 6 - Oligonucleotide primer and probe sequences used in the present study.*
