# Supplementary material for: Metas-Chip precisely identifies presence of micrometastasis in live biopsy samples by label free approach
Source: PubMed Central journal article supplement (PMC5736647; doi:10.1038/s41467-017-02184-x), 2017-12-19
Supplement: 41467_2017_2184_MOESM2_ESM.pdf [file 41467_2017_2184_MOESM2_ESM.pdf]

## **Description of Additional Supplementary Files**

File Name: Supplementary Movie 1

Description: Invasion of a metastatic cluster to a vascular cell

File Name: Supplementary Movie 2

Description: Selective attachment of single HUVECs on sensing traps by DEP

File Name: Supplementary Movie 3

Description: Preferred attachment of a metastatic cell on the vascular cell

File Name: Supplementary Movie 4

Description: Operation of MetasChip on a biopsy sample

File Name: Supplementary Movie 5

Description: Interaction of non-malignant lymph node with HUVEC

File Name: Supplementary Movie 6

Description: Interaction of WBCs of a healthy donator with HUVEC

File Name: Supplementary Movie 7

Description: Interaction of malignant lymph node sample, resected by FNA, with HUVEC

File Name: Supplementary Movie 8

Description: Identification of a metastatic cell by a WBC without suppressing its invasion to the HUVEC

File Name: Supplementary Movie 9

Description: Migration of a WBC among HUVECs
